# Supplementary material
Source: publisher site journal article supplement (https://www.dovepress.com/article/282469)
Supplement: Supplementary file 1 [file get_supplementary_file.php]

PATIENT SATISFACTION SURVEY

1. Without the use of glasses, you would classify your vision during daytime as:
2. Very good
3. Good
4. Regular
5. Bad
6. Without the use of glasses, you would classify your vision during nighttime as:
7. Very good
8. Good
9. Regular
10. Bad
11. Without the use of glasses, you experience glare from car lights:
12. No
13. Yes, but only a little and it does not bother or limit me.
14. Yes, to a moderate degree.
15. Yes, to a severe degree and it limits me.
16. Without the use of glasses, you experience halos around lights during nighttime :
17. No
18. Yes, but only a little and it does not bother or limit me.
19. Yes, to a moderate degree.
20. Yes, to a severe degree and it limits me.
21. Without the use of glasses, you can carry out social activities such as watching television, going to the movies, driving, reading the newspaper and/or magazines, signing checks:
22. Always
23. Almost always
24. Sometimes
25. I always need glasses to do these activities.
26. Without the use of glasses, how do you rate your intermediate vision (the one used to read on the computer, read on the desk, read the titles of books on a shelf, apply makeup, shave, see the information on the dashboard of a vehicle, etc.):
    1. Very good
    2. Good
    3. Regular
    4. Bad
27. After surgery you need glasses for distance vision:
    1. Always
    2. Sometimes
    3. Never
28. From 1 to 10, what is your degree of satisfaction with your distance vision: ______
29. After surgery you need glasses for near vision:
    1. Always
    2. Sometimes
    3. Never
30. From 1 to 10, what is your degree of satisfaction with your near vision: ______
31. After surgery you need glasses for intermediate vision:
    1. Always
    2. Sometimes
    3. Never
32. From 1 to 10, what is your degree of satisfaction with your intermediate vision: ______
33. Regarding quality of life, what is the degree of satisfaction that you feel that surgery has provided:
    1. High
    2. Good
    3. Regular
    4. Low
34. In view of the results, would you recommend this surgery to a family member or relative:
    1. Yes
    2. No

Name of Patient: ________________________________________
